# Supplementary material for: Activation of Adenosine 2A receptor inhibits neutrophil apoptosis in an autophagy-dependent manner in mice with systemic inflammatory response syndrome
Source: PubMed Central journal article supplement (PMC5028892; doi:10.1038/srep33614), 2016-09-20
Supplement: srep33614-s1.pdf [file srep33614-s1.pdf]

**Activation of Adenosine 2A receptor inhibits neutrophil apoptosis in an autophagy-dependent manner in mice with systemic inflammatory response syndrome**

Yang-Wuyue Liu<sup>1</sup>; Ting Yang<sup>1</sup>; Li Zhao<sup>1</sup>; Zhenhong Ni<sup>1</sup>; Nan Yang<sup>2</sup>;

Fengtian He<sup>1</sup> ; Shuang-Shuang Dai<sup>1\*</sup>

**Supplementary Table S1: Abbreviations and working doses about drugs used in this article**

| Chemical Ingredient                                                                                                          | Abbreviation | Working dose | Company                                      |
|------------------------------------------------------------------------------------------------------------------------------|--------------|--------------|----------------------------------------------|
| Lipopolysaccharides from <i>Escherichia coli</i> 0111:B4                                                                     | LPS          | 1000ng/ml    | Sigma-Aldrich<br>(Shanghai,<br>China)        |
| N acetylcysteine                                                                                                             | NAC          | 10mM         |                                              |
| 3-[4-[2-[[6-amino-9-[(2R,3R,4S,5S)-5-(ethylcarbamoyl)-3,4-dihydroxy-oxolan-2-yl]purin-2-yl]amino]ethyl]phenyl]propanoic acid | CGS          | 0.1 μ M      | TOCRIS<br>(Bristol, UK)                      |
| 4-(2-[7-Amino-2-(2-furyl)[1,2,4]triazolo[2,3-a][1,3,5]triazin-5-ylamino]ethyl)phenol                                         | ZM           | 1 μ M        |                                              |
| 3',4',5',6'-Tetrahydroxyspiro[isobenzofuran-1(3H),9'-(9H)xanthen]-3-one                                                      | Gallein      | 10 μ M       |                                              |
| Highly selective inhibitor of phosphatidylinositol kinase                                                                    | LY294002     | 10 μ M       | Cell Signaling<br>Technology<br>(Boston, MA) |
| N-[2-[[3-(4-bromophenyl)-2-propenyl]amino]ethyl]-5-isoquinolinesulfonamide dihydrate dihydrochloride                         | H-89         | 10 μ M       | Beyotime<br>(Tianjin,China)                  |
| 1H-Pyrrole-2,5-dione,3-[1-[3-(dimethylamino)propyl]-1H-indol-3-yl]-4-(1H-indol-3-yl)                                         | GFX          | 5 μ M        | SelleckChem<br>(San Diego, CA)               |
| Rapamysin                                                                                                                    | RAPA         | 50nM         |                                              |
| 3-methyladenine                                                                                                              | 3-MA         | 2mM          |                                              |

**Supplementary Table S2: Dilution ratios and companies about antibodies used in this paper.**

| Antibody                                                         | Dilution | Company                                      |
|------------------------------------------------------------------|----------|----------------------------------------------|
| LC3                                                              | 1:1000   | Cell Signaling<br>Technology(Boston, MA)     |
| P38                                                              |          |                                              |
| p-P38                                                            |          |                                              |
| p-ERK                                                            |          |                                              |
| p-JNK                                                            |          |                                              |
| PARP                                                             |          |                                              |
| Cleaved caspase3                                                 |          |                                              |
| P110                                                             | 1:800    | Santuz Cruz Biotechnology<br>(Dallas, Texas) |
| P110 $\gamma$                                                    |          |                                              |
| AKT                                                              |          |                                              |
| p-AKT(Thr 308)                                                   |          |                                              |
| p-AKT(Ser 473)                                                   |          |                                              |
| goat anti-rabbit horseradish<br>peroxidase conjugated antibody   | 1:10000  | KangChen<br>Biotechnology(Shanghai,China).   |
| goat anti- mouse horseradish<br>peroxidase conjugated antibodies |          |                                              |
| donkey anti-goat horseradish<br>peroxidase conjugated antibodies |          |                                              |
| GAPDH                                                            | 1:3000   |                                              |
